# Supplementary material for: Butyrylated starch protects mice from DSS-induced colitis: combined effects of butyrate release and prebiotic supply
Source: Royal Society of Chemistry journal article supplement (doi:10.1039/d1fo01913a), 2021-01-01
Supplement: d1fo01913a1.pdf [file d1fo01913a1.pdf]

## Supplementary Information

Butyrylated starch protects mice from DSS-induced colitis:  
combined effects of butyrate release and prebiotic supply

Lingjin Li <sup>b</sup>, Li Cheng <sup>a, b, c</sup>, Zhaofeng Li <sup>a, b, c</sup>, Caiming Li <sup>a, b, c</sup>, Yan Hong <sup>a, b, c\*</sup>,

Zhengbiao Gu <sup>a, b, c\*</sup>

<sup>a</sup> Key Laboratory of Synthetic and Biological Colloids, Ministry of Education, Wuxi  
214122, China

<sup>b</sup> School of Food Science and Technology, Jiangnan University, Wuxi 214122, China

<sup>c</sup> Collaborative Innovation Center for Food Safety and Quality Control, Jiangnan  
University, Wuxi 214122, China

\*Corresponding authors:

School of Food Science and Technology, Jiangnan University, Wuxi, 214122, China.

Tel/fax: +86-0510-85329237.

*E-mail addresses:*

[hongyan@jiangnan.edu.cn](mailto:hongyan@jiangnan.edu.cn) (Yan Hong)

[zhengbiaogu@jiangnan.edu.cn](mailto:zhengbiaogu@jiangnan.edu.cn)

(Zhengbiao

Gu)

**Table S1.** Components of experimental mouse diet.

| Component              | Basic Diet |       | BS-0.6% |       | BS-2.4% |       |
|------------------------|------------|-------|---------|-------|---------|-------|
|                        | Gm%        | Kcal% | Gm%     | Kcal% | Gm%     | Kcal% |
| Butyrylated Starch     | 0          | 0     | 24      | 60    | 6       | 15    |
| Casein                 | 200        | 800   | 200     | 800   | 200     | 800   |
| L-Cystine              | 3          | 12    | 3       | 12    | 3       | 12    |
| Corn Starch            | 540        | 2160  | 516     | 2064  | 534     | 2136  |
| Sucrose                | 100        | 380   | 100     | 380   | 100     | 380   |
| Cellulose, BW200       | 50         | 0     | 50      | 0     | 50      | 0     |
| Soybean Oil            | 50         | 450   | 50      | 450   | 50      | 450   |
| Lard                   | 0          | 0     | 0       | 0     | 0       | 0     |
| Mineral Mix S10026     | 10         | 0     | 10      | 0     | 10      | 0     |
| DiCalcium Phosphate    | 13         | 0     | 13      | 0     | 13      | 0     |
| Calcium Phosphate      | 5.5        | 0     | 5.5     | 0     | 5.5     | 0     |
| Potassium Citrated·H2O | 16.5       | 0     | 16.5    | 0     | 16.5    | 0     |
| Vitamin Mix V10001     | 10         | 40    | 10      | 40    | 10      | 40    |
| Choline Bitartrate     | 2          | 0     | 2       | 0     | 2       | 0     |
| FD&C Yellow Dye #5     | 0.05       | 0     | 0       | 0     | 0       | 0     |
| FD&C Red Dye #40       | 0          | 0     | 0.05    | 0     | 0       | 0     |
| FD&C Blue Dye #1       | 0          | 0     | 0       | 0     | 0.05    | 0     |
| Total                  | 1000.05    | 3842  | 1000.05 | 3776  | 1000.05 | 3803  |

**Table S2.** Primer sequences of RT-PCR.

| Transcript     | Forward primer           | Reverse primer           |
|----------------|--------------------------|--------------------------|
| MPO            | CGTGTCAAGTGGCTGTGCCTAT   | AACCAGCGTACAAAGGCACGGT   |
| iNOS           | GAGACAGGGAAGTCTGAAGCAC   | CCAGCAGTAGTTGCTCCTCTTC   |
| Cadherin-1     | TCATGAGCGTGCCCCAGTAT     | CGGCTGCCTTCAGGTTTTTCAT   |
| ZO-1           | CTTCTCTTGCTGGCCCTAAAC    | TGGCTTCACTTGAGGTTTTCTG   |
| Claudin-3      | AAACCTCGCCCTTCCCAAGA     | GCCCGTTTCATGGTTTGCCT     |
| IL-6           | ATCCAGTTGCCTTCTTGGGACTGA | TAAGCCTCCGACTTGTGAAGTGGT |
| IL-10          | CGGGAAGACAATAACTGCACCC   | CGGTTAGCAGTATGTTGTCCAGC  |
| Tgf- $\beta$   | CCGCAACAACGCCATCTATG     | CCCGAATGTCTGACGTATTGAAG  |
| TNF            | TCTTCTCATTCCCTGCTTGTTGGC | CACTGGTGGTTTGCTACGACG    |
| Gapdh          | TGGAAGGGCTCATGACCACAG    | ATCCACGACGGACACATTGG     |
| $\beta$ -actin | ACCACCATGTACCCAGGCAT     | AGCTCAGTAACAGTCCGCCT     |
